# Supplementary material for: Osteoporosis screening using machine learning and electromagnetic waves
Source: PubMed Central journal article supplement (PMC10409756; doi:10.1038/s41598-023-40104-w), 2023-08-08
Supplement: 41598_2023_40104_MOESM1_ESM.pdf [file 41598_2023_40104_MOESM1_ESM.pdf]

## Supplementary Information

### Osteoporosis Screening using Machine Learning and Electromagnetic Waves

Gabriela A. Albuquerque, Dionísio D. A. de Carvalho, Agnaldo S. Cruz, João Paulo Q. Santos, Guilherme M. Machado, Ignácio S. Gendriz, Felipe R. S. Fernandes, Ingridy M. P. Barbalho, Marquiony M. Santos, César A. D. Teixeira, Jorge M. O. Henriques, Paulo Gil, Adrião D. D. Neto, Antonio L. P. S. Campos, Josivan G. Lima, Jailton C. Paiva, Antonio H. F. Morais, Thaisa Santos Lima, Ricardo A. M. Valentim

The dataset and data dictionary is available on DOI: [10.5281/zenodo.7779063](https://doi.org/10.5281/zenodo.7779063)

**Table 1 - Data dictionary**

| <b>Name</b> | <b>Description</b>                                                                     | <b>Values/Types</b>                                             |
|-------------|----------------------------------------------------------------------------------------|-----------------------------------------------------------------|
| Gender      | Gender of the patient                                                                  | Text<br>Options: male and female                                |
| Age         | Age of the patient                                                                     | integer                                                         |
| Weight      | Weight (kg) of the patient                                                             | integer                                                         |
| Height      | Height (cm) of the patient                                                             | integer                                                         |
| Race        | Race of the patient                                                                    | Text<br>Options: white, black, brown                            |
| SD          | Standard deviation of the bone density reading pointed out by DXA (T-score or Z-score) | Float                                                           |
| DXA class   | DXA reported result                                                                    | Text<br>Options: normal, low bone mineral density, osteoporosis |
| Alcohol     | Patient consumes alcoholic beverages                                                   | Text<br>Option: yes or no                                       |

|                      |                                                                                                                                   |                           |
|----------------------|-----------------------------------------------------------------------------------------------------------------------------------|---------------------------|
| Smoking              | Patient smokes or has smoked                                                                                                      | Text<br>Option: yes or no |
| Activity             | Patient practices physical activity                                                                                               | Text<br>Option: yes or no |
| Milk                 | Patient consumes milk                                                                                                             | Text<br>Option: yes or no |
| Calcium              | Patient takes calcium supplements                                                                                                 | Text<br>Option: yes or no |
| Vitamin D            | Patient exposes himself to the sun or takes vitamin D supplements                                                                 | Text<br>Option: yes or no |
| Fall                 | Patient suffered a fracture due to a fall                                                                                         | Text<br>Option: yes or no |
| Parents osteoporosis | Parents has been diagnosed with osteoporosis or has broken a bone after a minor fall                                              | Text<br>Option: yes or no |
| Parents curved       | Parents become hunched over                                                                                                       | Text<br>Option: yes or no |
| Corticosteroids      | Patient took corticosteroids for more than 3 months                                                                               | Text<br>Option: yes or no |
| Arthritis            | Patient was diagnosed with rheumatoid arthritis                                                                                   | Text<br>Option: yes or no |
| Diseases             | Hyperthyroidism, overactive parathyroid glands, diabetes, or gastrointestinal disorders such as Crohn's disease or celiac disease | Text<br>Option: yes or no |
| Menopause            | Patient is in menopause                                                                                                           | Text<br>Option: yes or no |
| Medial_length        | Length of the medial phalanx in mm                                                                                                | Integer                   |
| Medial_width         | Width of the medial phalanx in mm                                                                                                 | Integer                   |
| Medial_height        | Height of the medial phalanx in mm                                                                                                | Integer                   |
| Calibration          | Osseus signal strength with no obstacle between the antennas                                                                      | Float                     |
| Attenuation          | Osseus signal strength with obstacle between antennas                                                                             | Float                     |

**Table 2 - The individual features' importance**

| Feature name           | Individual importance |
|------------------------|-----------------------|
| 'age'                  | 0,227401422           |
| 'bmi'                  | 0,134514324           |
| 'attenuation'          | 0,090009995           |
| 'menopause'            | 0,082911314           |
| 'medial_length'        | 0,070223803           |
| 'calcium'              | 0,059159597           |
| 'medial_width'         | 0,044219638           |
| 'smoking'              | 0,04115462            |
| 'medial_height'        | 0,044854411           |
| 'vitamin_d'            | 0,037013363           |
| 'ethnicity'            | 0,030213327           |
| 'fall'                 | 0,023385329           |
| 'parents_osteoporosis' | 0,022814332           |
| 'disease'              | 0,021100977           |
| 'milk'                 | 0,015772743           |
| 'gender'               | 0,014214909           |
| 'activity'             | 0,012339511           |
| 'corticosteroid'       | 0,012697214           |
| 'alcohol'              | 0,010059062           |
| 'arthritis'            | 0,004432955           |
| 'parents_curved'       | 0,001507154           |

**Table 3 - score mean and range on each category.**

| Score                         | Mean  | Range of values |
|-------------------------------|-------|-----------------|
| <b>T-Score (455 samples):</b> |       |                 |
| <i>Healthy (76):</i>          | -0.31 | [-0.9, 1.9]     |
| <i>Sick (379):</i>            | -2.44 | [-5.4, -1.0]    |
|                               |       |                 |
| <b>Z-Score (50 samples):</b>  |       |                 |
| <i>Healthy (34):</i>          | -0.77 | [-2.0, 2.7]     |
| <i>Sick (16):</i>             | -2.79 | [-4.3, -2.1]    |

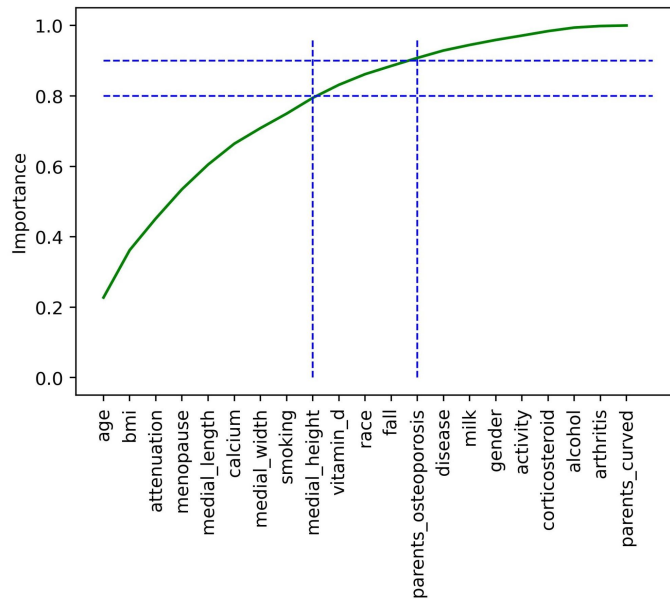

Fig. 1.a. Cumulative importance of features

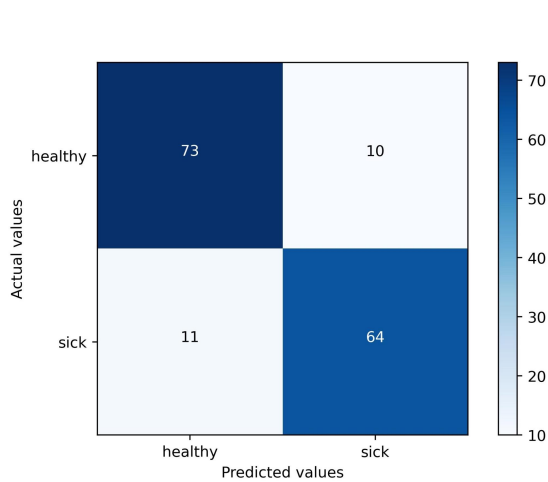

Fig 1.b. All features

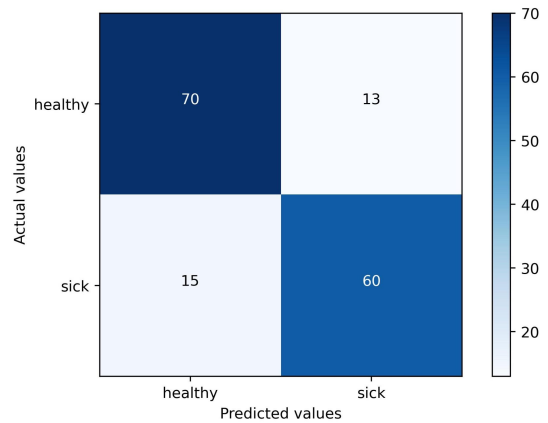

Fig 1.c. Without Osseus signal

**Comparison all features vs. without Osseus**

**Shapiro-wilk results for normal distribution**

Shapiro-wilk (all features): 0.43

Shapiro-wilk (without Osseus signal): 0.66

T-test: 0.75

p-value: 0.46

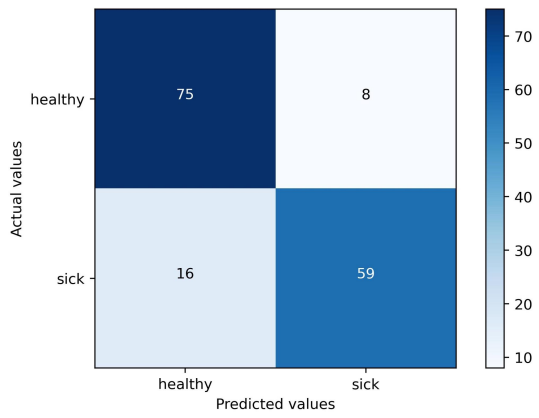

Fig 1.d. Without Age

**Comparison all features vs. without age**

Shapiro-wilk (without age): 0.30

T-test: 1.70,

p-value: 0.10
